# Supplementary material for: Impact of temperature on the role of Criegee intermediates andperoxy radicals in dimers formation from β-pinene ozonolysis
Source: Copernicus journal article supplement (doi:10.5194/egusphere-2023-1425), 2023-07-24
Supplement: Supplementary file 1 [file egusphere-2023-1425-supplement.pdf]

*Supplement of*

Impact of temperature on the role of Criegee intermediates and peroxy radicals in dimers formation from  $\beta$ -pinene ozonolysis

5

Yiwei Gong<sup>1,2</sup>, Feng Jiang<sup>2</sup>, Yanxia Li,<sup>2</sup> Thomas Leisner<sup>2,3</sup>, and Harald Saathoff<sup>2</sup>

<sup>1</sup>Department of Atmospheric and Oceanic Sciences, School of Physics, Peking University, Beijing, China

<sup>2</sup>Institute of Meteorology and Climate Research, Karlsruhe Institute of Technology, Karlsruhe, Germany

<sup>3</sup>Institute of Environmental Physics, Heidelberg University, Heidelberg, Germany

10 *Correspondence to:* Yiwei Gong (yiwei.gong@kit.edu) and Harald Saathoff (harald.saathoff@kit.edu)

**Table S1. Main updates to the formation of  $\beta$ -pinene-derived Criegee intermediates suggested for MCM v3.3.2.**

| No. | Modified reaction                                        | Branching ratio in MCM | Updated branching ratio | Reference                                                                   |
|-----|----------------------------------------------------------|------------------------|-------------------------|-----------------------------------------------------------------------------|
| 1   | BPINENE + O <sub>3</sub> →NOPINONE + CH <sub>2</sub> OOF | 0.40                   | 0.20                    | Ma and Marston, 2008;<br>Nguyen et al., 2009;<br>This work                  |
| 2   | BPINENE + O <sub>3</sub> →NOPINOOA + HCHO                | 0.60                   | 0.80                    | Ma and Marston, 2008;<br>Nguyen et al., 2009;<br>This work                  |
| 3   | CH <sub>2</sub> OOF→CH <sub>2</sub> O                    | 0.37                   | 0.50                    | Ahrens et al., 2014;<br>Winterhalter et al., 2000;<br>Zhang and Zhang, 2005 |
| 4   | CH <sub>2</sub> OOF→HO <sub>2</sub> +CO+OH               | 0.13                   | 0.30                    | Atkinson et al., 1992;<br>Nguyen et al., 2009                               |
| 5   | CH <sub>2</sub> OOF→CO                                   | 0.50                   | 0.20                    | This work                                                                   |
| 6   | NOPINOOA→NOPINOO                                         | 0.17                   | 0.40                    | Ahrens et al., 2014;<br>Winterhalter et al., 2000;<br>Zhang and Zhang, 2005 |
| 7   | NOPINOOA→NOPINDO <sub>2</sub> + OH                       | 0.50                   | 0.30                    | Atkinson et al., 1992;<br>Nguyen et al., 2009                               |
| 8   | NOPINOOA→C <sub>8</sub> BC                               | 0.33                   | 0.30                    | This work                                                                   |

15

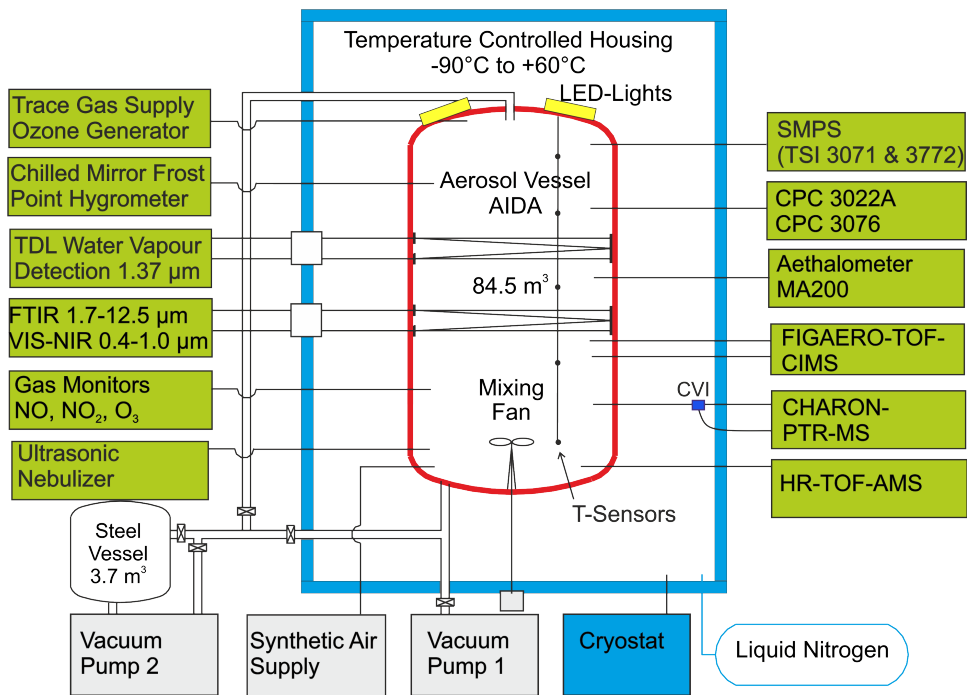

Figure S1. Schematic of the AIDA simulation chamber with the typical instrumentation.

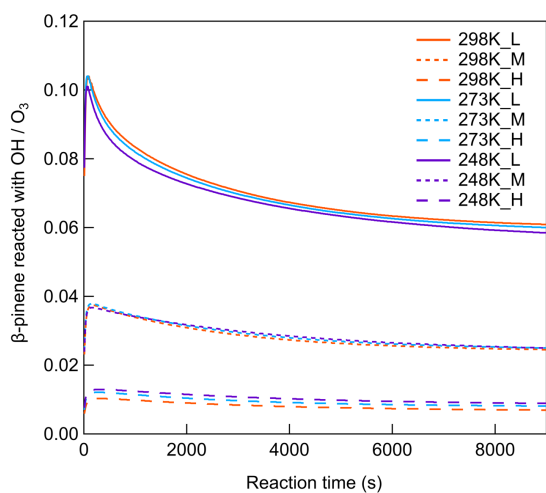

**Figure S2.** The ratio of the accumulated amount of  $\beta$ -pinene reacted with OH versus  $O_3$  at different  $[HO_2]/[RO_2]$  conditions and different temperatures (Exp. 298abc, 273abc, 248abc).

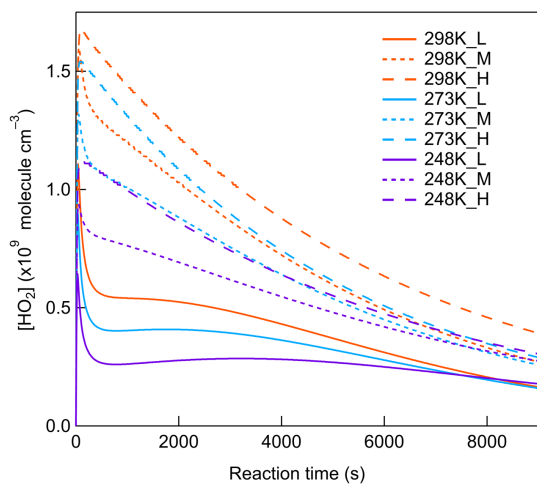

Figure S3. Simulated HO<sub>2</sub> concentration as a function of reaction time at different [HO<sub>2</sub>]/[RO<sub>2</sub>] conditions and different temperatures (Exp. 298abc, 273abc, 248abc).

30

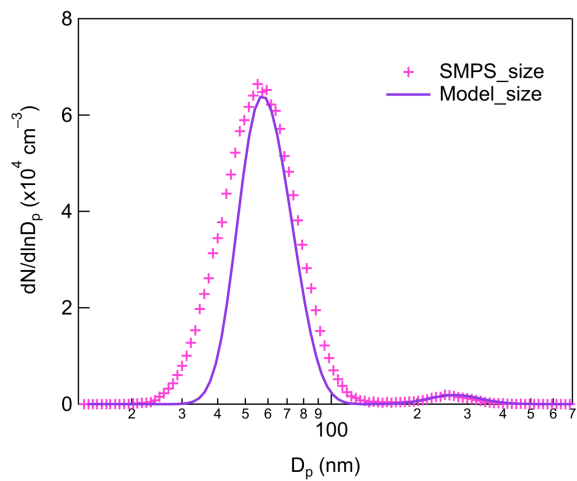

Figure S4. Particle size distribution from SMPS measurement and COSIMA model result at 7000 s of reaction (Exp. 298a).

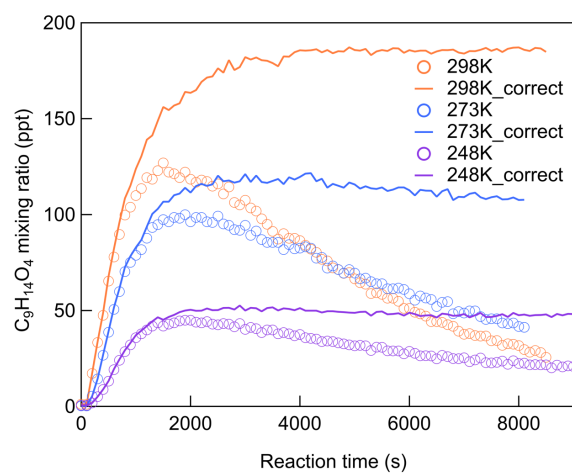

Figure S5. The mixing ratio of gas-phase  $C_9H_{14}O_4$  before (measured) and after wall loss correction (modeled) at different temperatures (Exp. 298a, 273a, 248a).

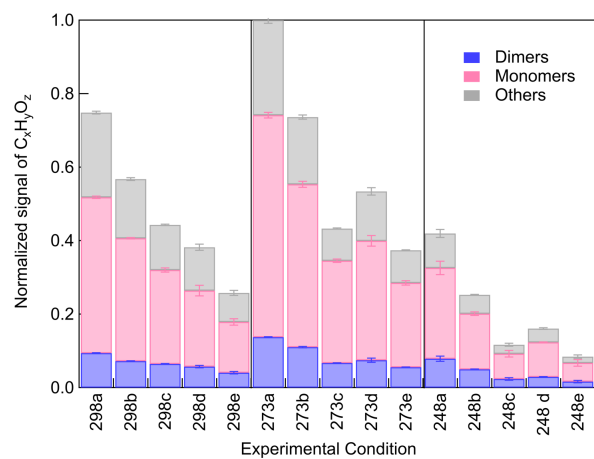

Figure S6. Normalized signals of all particle-phase  $C_xH_yO_z$  compounds for different experimental conditions.



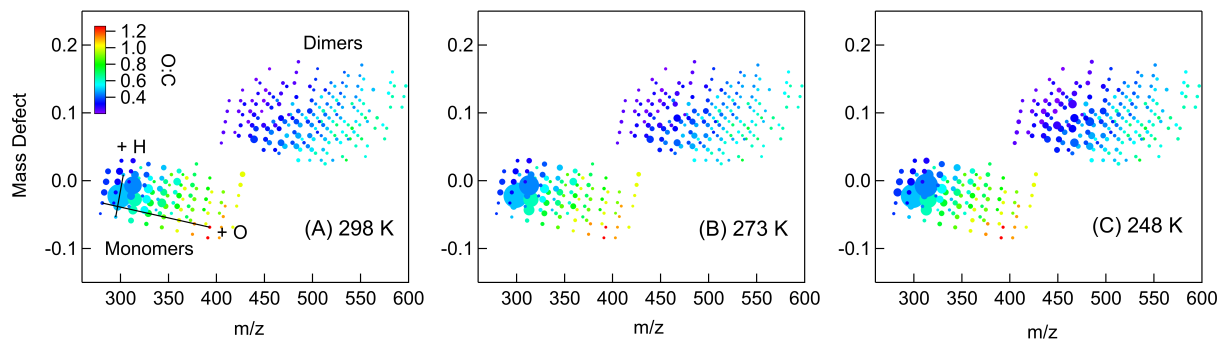

45

**Figure S7. Mass defect plots of particle-phase monomers and dimers (with  $\Gamma^-$ ) at different temperatures (Exp. 298a, 273a, 248a). Markers are sized by the square root of their signals and colored by the O/C ratio.**

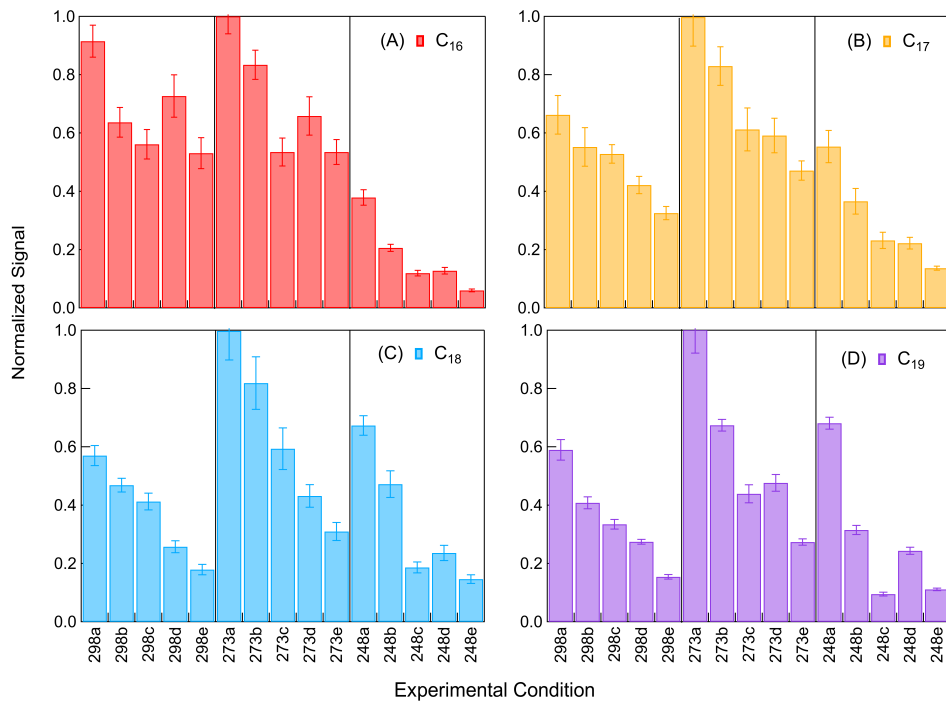

**Figure S8.** The particle-phase signals of (A)  $C_{16}$  (B)  $C_{17}$  (C)  $C_{18}$  (D)  $C_{19}$  dimers normalized to the peak intensity under different experimental conditions.

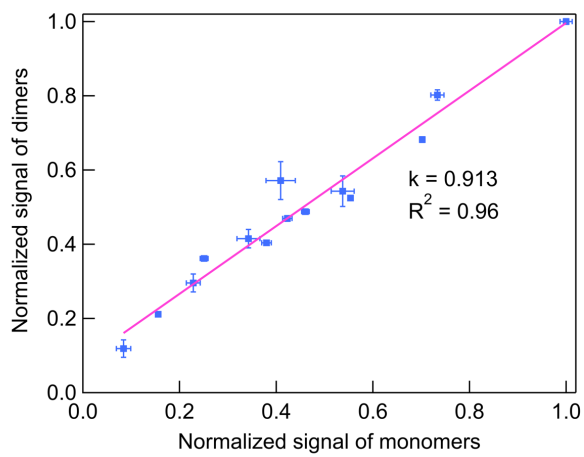

**Figure S9.** The correlation between particle-phase normalized signal of dimers with normalized signal of monomers. The solid line shows a linear fit.

60

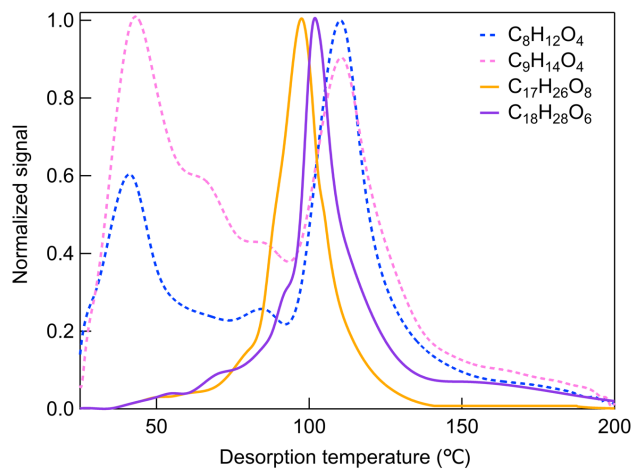

65 **Figure S10. Thermograms of abundant monomers (C<sub>8</sub>H<sub>12</sub>O<sub>4</sub> and C<sub>9</sub>H<sub>14</sub>O<sub>4</sub>) and dimers (C<sub>17</sub>H<sub>26</sub>O<sub>8</sub> and C<sub>18</sub>H<sub>28</sub>O<sub>6</sub>), i.e., the normalized signals versus desorption temperature.**

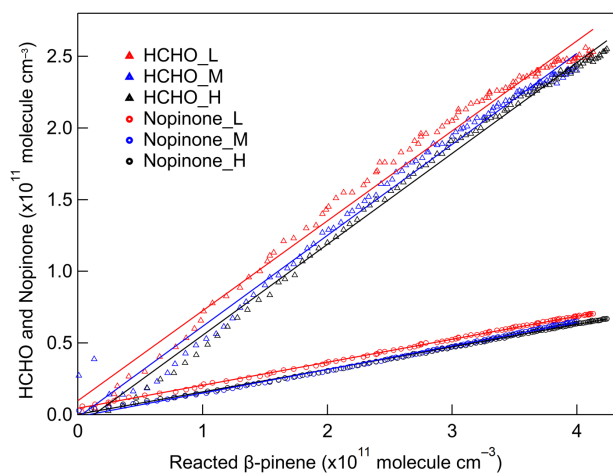

70 **Figure S11.** The formation of formaldehyde (HCHO) and nopinone as a function of  $\beta$ -pinene reacted at 298 K for different  $[\text{HO}_2]/[\text{RO}_2]$  (Exp. 298abc). The lines represent linear fits and  $R^2$  values are larger than 0.95.

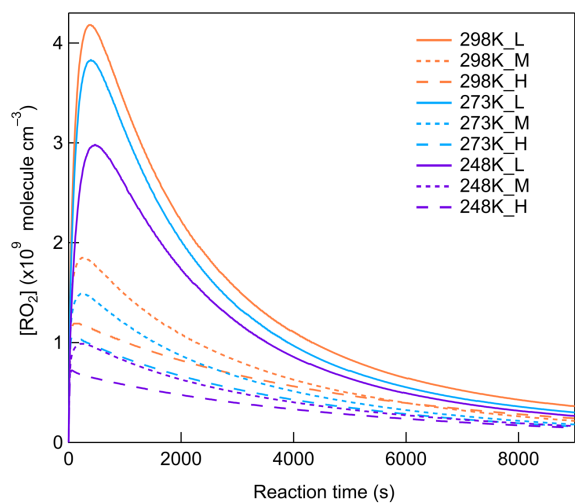

75

**Figure S12. Simulated RO<sub>2</sub> concentration as a function of reaction time at different [HO<sub>2</sub>]/[RO<sub>2</sub>] conditions and different temperatures (Exp. 298abc, 273abc, 248abc).**

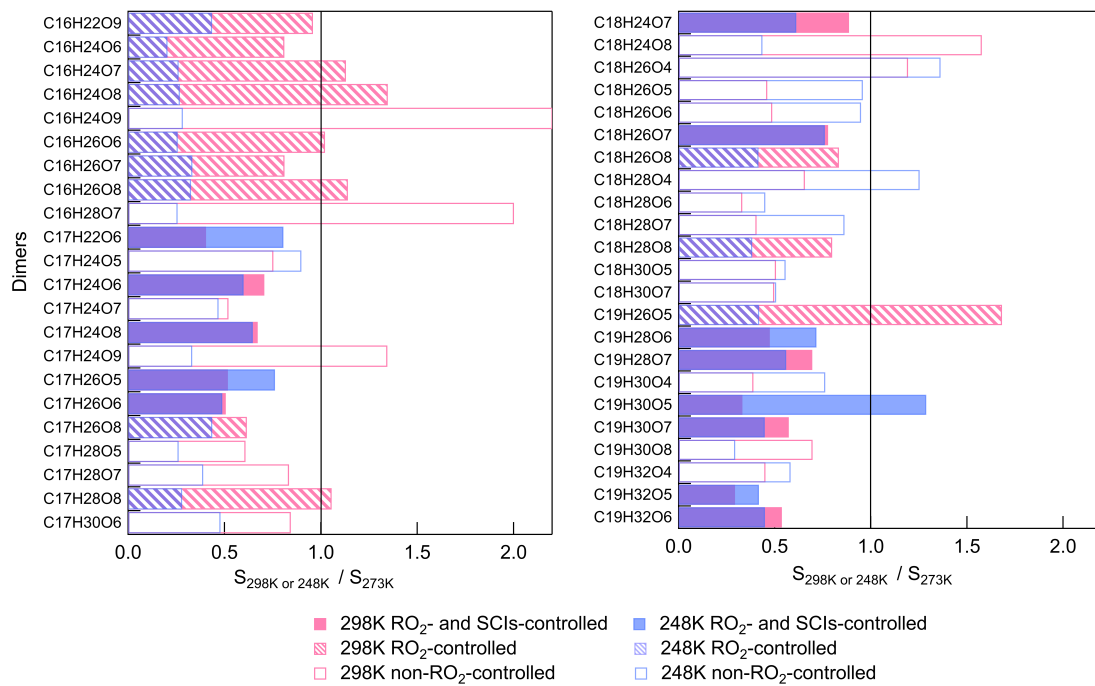

**Figure S13. The relative changes of RO<sub>2</sub>-controlled and non-RO<sub>2</sub>-controlled abundant dimers at 298 K or 248 K versus 273 K (The relative standard deviations are within 25 %).**

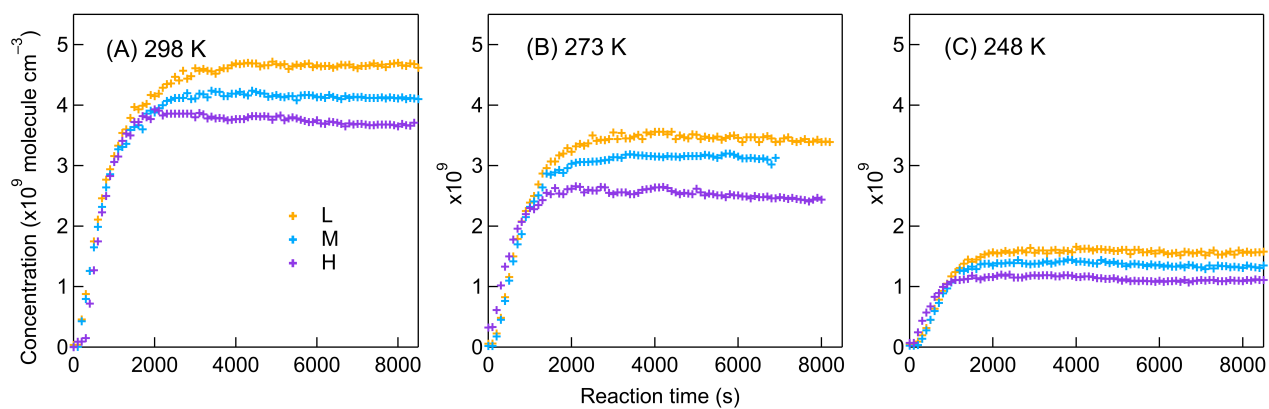

**Figure S14.** The impact of  $[HO_2]/[RO_2]$  on the gas-phase concentrations of  $C_9H_{14}O_4$  at (A) 298 K (B) 273 K (C) 248 K after wall loss correction (Exp. 298abc, 273abc, 248abc).
